# Supplementary material for: Phosphorylation of Thr-225 and Ser-262 on ERD7 Promotes Age-Dependent and Stress-Induced Leaf Senescence through the Regulation of Hydrogen Peroxide Accumulation in Arabidopsis thaliana
Source: MDPI journal article supplement (doi:10.3390/ijms25021328), 2024-01-22
Supplement: s1 [file s1]

Supplementary Figures

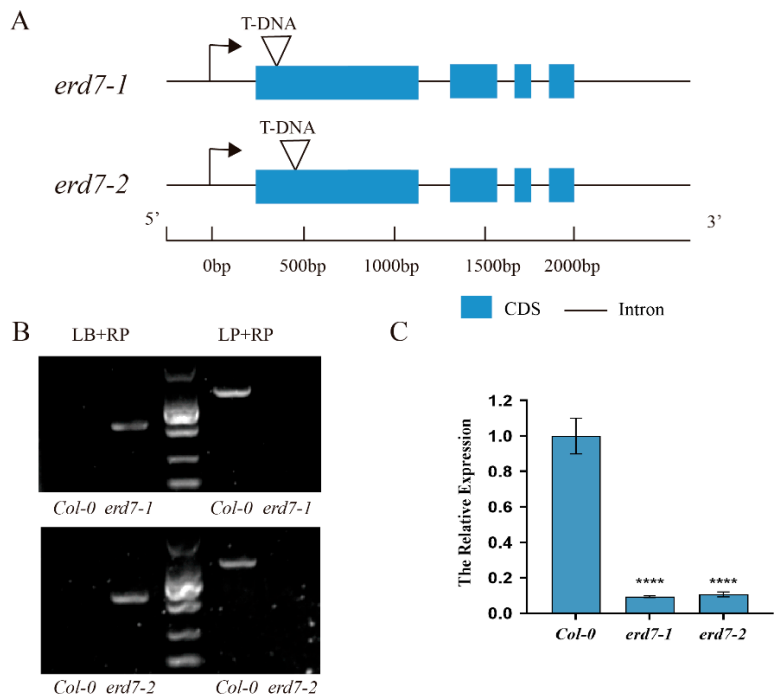

**Figure S1.** Generation and characterization of ERD7 transgenic Arabidopsis mutant lines. (A) Schematic representation of the gene structure and T-DNA insertion of the two mutant lines of ERD7 (B) Verification of purity of *erd7* mutant by triple priming method (C) The relative expression levels of ERD7 in Mutant lines.

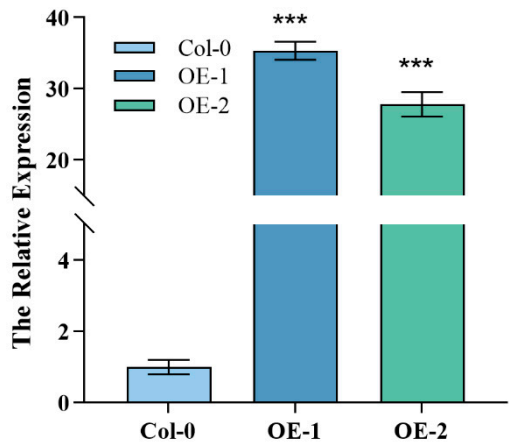

**Figure S2.** The relative expression levels of ERD7 in overexpression lines.

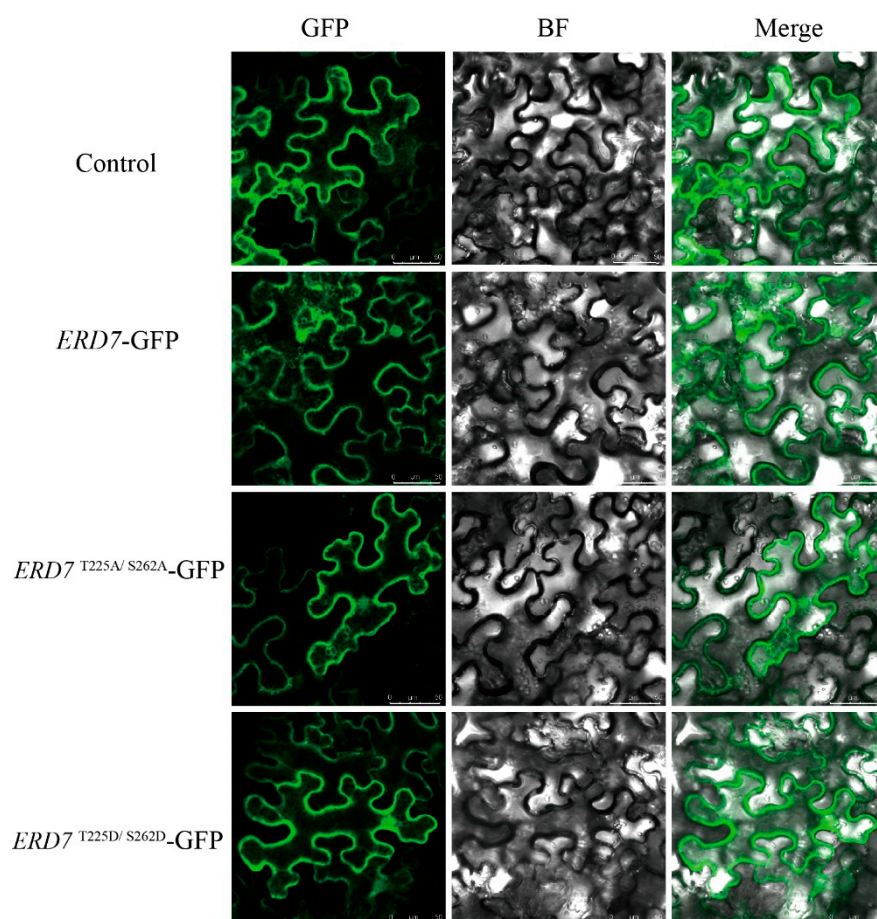

**Figure S3.** Subcellular localization analysis of ERD7 and ERD7 phosphorylation sites after mutation.

**Table S1.** Identification of ERD7 protein phosphorylation sites by mass spectrometry

| Gene name | Position | Amino acid | Score  | Modified sequence       | Modifications | m/z        | Mass error [ppm] | Score  |
|-----------|----------|------------|--------|-------------------------|---------------|------------|------------------|--------|
| ERD7      | 225      | T          | 100.69 | ETSPVELT(1)GER          | Phospho (STY) | 649.287215 | 0.61419          | 130.78 |
| ERD7      | 262      | S          | 130.78 | LIAT(0.01)GS(0.99)GHLIK | Phospho (STY) | 397.2162   | 1.1773           | 121.56 |

**Table S2.** Primers used in this study.

| Primer Name | Sequence (5'-3')        |
|-------------|-------------------------|
| AtrbohD-Q-F | TCCACGCACTCAAAGGTCTC    |
| AtrbohD-Q-R | CCGGCGAGCTAATGCTCTAA    |
| AtrbohF-Q-F | TGACACGCCAAGACGAAAGA    |
| AtrbohF-Q-R | GAGCAGAACGAGCATCACCT    |
| erd7-1-LP   | ACTTCTTCTCTTTACCCTACTGT |
| erd7-1-RP   | CCATTAGATCTGCAGCTTCAC   |
| erd7-2-LP   | ACTTCTTCTCTTTACCCTACTGT |
| erd7-2-RP   | CCATTAGATCTGCAGCTTCAC   |
| LB          | GTCCGCAATGTGTTATTAAGTTG |
| ERD7-Q-F    | CACAAGTATGGTGGTAAAGCGG  |
| ERD7-Q-R    | AGCTGCAGATCTAATGGCGG    |

---

|               |                           |
|---------------|---------------------------|
| SAG12-Q-F     | TCCAATTCTATTCGTCTGGTGTGT  |
| SAG12-Q-R     | CCACTTTCTCCCCATTTTGTTT    |
| ACT2-Q-F      | TGTGCCAATCTACGAGGGTTT     |
| ACT2-Q-R      | TTTCCCGCTCTGCTGTTGT       |
| PRI101-ERD7-F | CGACCCCGGGGGTACCATGGAAT   |
| PRI101-ERD7-R | CTTGCTCACCATGAATTCCTAGGCT |

---
